# Supplementary material for: SNHG8 is identified as a key regulator of epstein-barr virus(EBV)-associated gastric cancer by an integrative analysis of lncRNA and mRNA expression
Source: PubMed Central journal article supplement (PMC5348371; doi:10.18632/oncotarget.13167), 2016-11-07
Supplement: oncotarget-07-80990-s001.pdf [file oncotarget-07-80990-s001.pdf]

## SNHG8 is identified as a key regulator of epstein-barr virus(EBV)--associated gastric cancer by an integrative analysis of lncRNA and mRNA expression

### Supplementary Materials

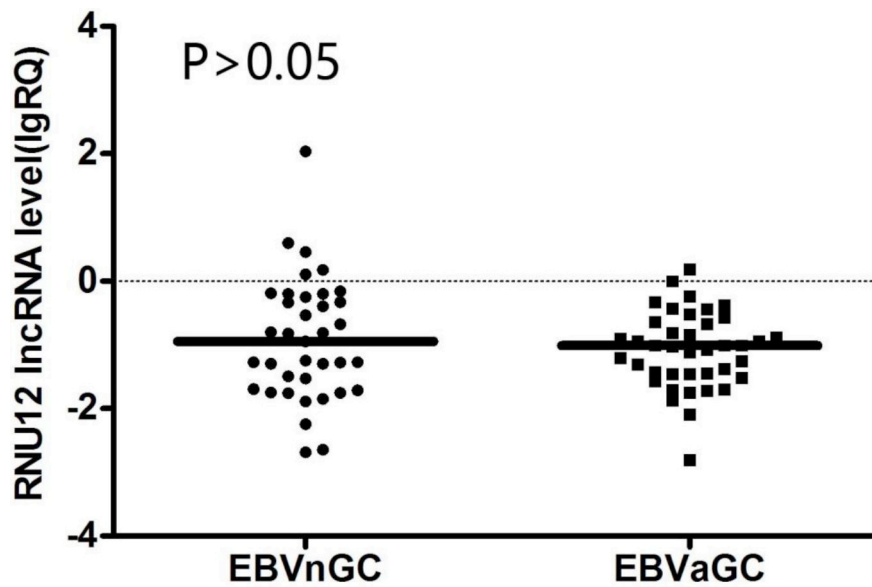

Supplementary Figure S1: Distribution of RNU12 lncRNA levels in EBVnGC and EBVaGC. Bold lines represent the mean value for each patient cohort;  $RQ=2^{-\Delta\Delta Ct}$ .

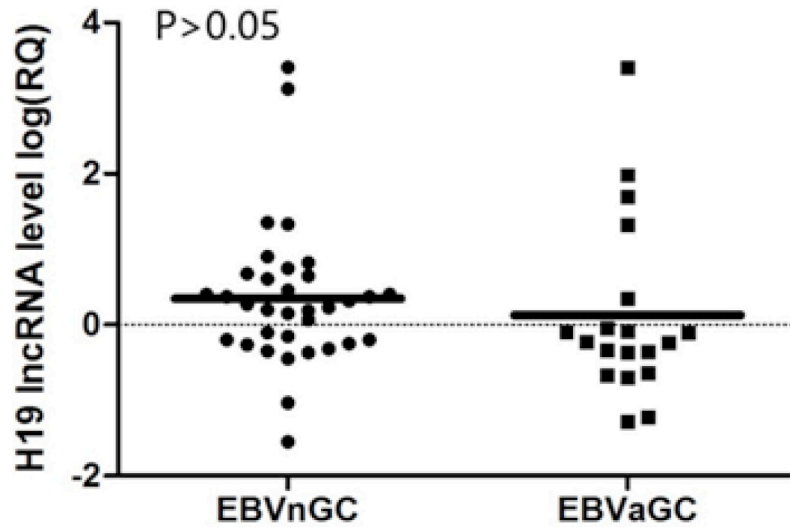

Supplementary Figure S2: Distribution of H19 lncRNA levels in EBVnGC and EBVaGC. Bold lines represent the mean value for each patient cohort;  $RQ=2^{-\Delta\Delta Ct}$ .

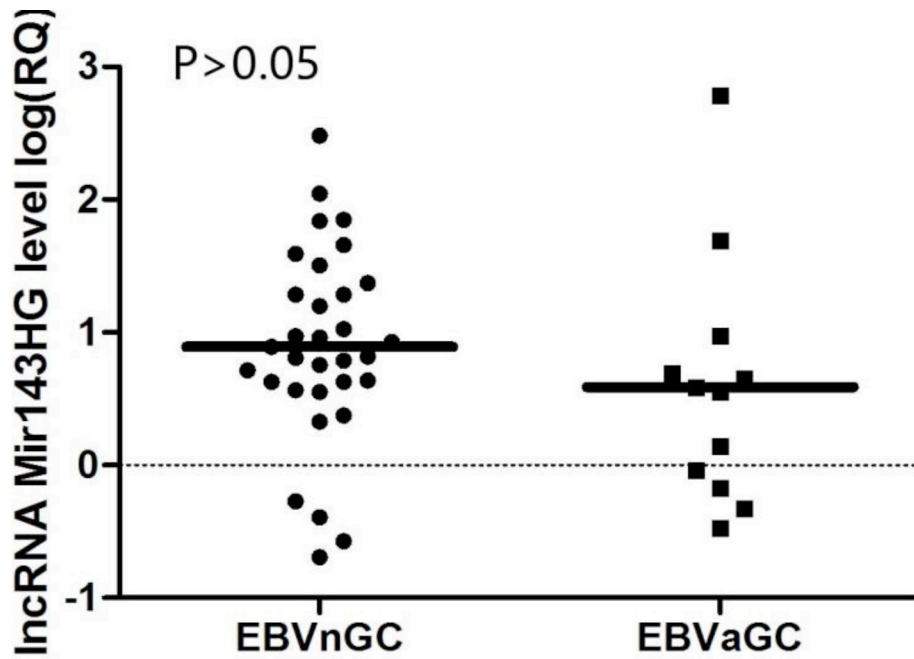

Supplementary Figure S3: Distribution of MIR143HG lncRNA levels in EBVnGC and EBVaGC. Bold lines represent the mean value for each patient cohort;  $RQ=2^{-\Delta\Delta Ct}$ .

**Supplementary Table S1: Primer and product of LncRNAs**

| GENE           | Forward primer       | Reverse primer        | Product | AnnealT |
|----------------|----------------------|-----------------------|---------|---------|
| SNHG8          | AAGTTTACAAGCATGCGCGG | TCAAACCTGACGGTTCTCGGG | 223 bp  | 60°C    |
| RNU12          | ATAACGATTCGGGGTGACGC | ACCTTGAGGGCGACCTTTAC  | 80 bp   | 55°C    |
| H19            | ATCGGTGCCTCAGCGTTCGG | CTGTCCTCGCCGTCACACCG  | 145 bp  | 60°C    |
| MIR143HG       | AGAAGACAGAGGTCCCCCAC | CAGTTTTACCTGGCGGCTCT  | 135 bp  | 60°C    |
| $\beta$ -actin | GCGTGACATTAAGGAGAAGC | CCACGTCACACTTCATGATGG | 236 bp  | 60°C    |

**Supplementary Table S2: Pathological features of gastric carcinoma for RNA sequencing and validated samples**

| Pathological parameters  | RNA sequencing samples | Validated samples |
|--------------------------|------------------------|-------------------|
| <b>Sex</b>               |                        |                   |
| male                     | 2                      | 69                |
| female                   |                        | 19                |
| <b>Age</b>               |                        |                   |
| < 60                     |                        | 48                |
| $\geq$ 60                | 2                      | 40                |
| <b>Location</b>          |                        |                   |
| EGJ <sup>a</sup>         |                        | 21                |
| Non-EGJ                  | 2                      | 67                |
| <b>Depth of invasion</b> |                        |                   |
| < T2                     |                        | 12                |
| $\geq$ T2                | 2                      | 76                |
| <b>Lauren's type</b>     |                        |                   |
| Intestinal-type          |                        | 28                |
| diffuse-type             | 2                      | 60                |
| <b>Tumor Size</b>        |                        |                   |
| < 5 cm                   |                        | 42                |
| $\geq$ 5 cm              | 2                      | 46                |
| <b>TNM stage</b>         |                        |                   |
| I+II                     |                        | 23                |
| III+IV                   | 2                      | 65                |
| <b>LN metastasis</b>     |                        |                   |
| absent                   |                        | 24                |
| present                  | 2                      | 64                |
| <b>EBV infection</b>     |                        |                   |
| absent                   | 1                      | 49                |
| present                  | 1                      | 39                |
